# Supplementary material for: Contributions of Protein-Coding and Regulatory Change to Adaptive Molecular Evolution in Murid Rodents
Source: PLOS journal article supplement (doi:10.1371/journal.pgen.1003995), 2013-12-05
Supplement: S11 (10.1371/journal.pgen.1003995.s011) [file journal.pgen.1003995.s011]

**Table S6.** Estimated parameters of a DFE model with three discrete mutation fitness effect bins ( $s=0$ ,  $s=s_2$  and  $s=1$ ) with proportions ( $p_1$ ,  $p_2$  and  $p_3$ ), the average fitness effect (weighted average of 0,  $s_2$  and 1), the change in log likelihood from a gamma model of the DFE ( $\Delta\log L = \log L_{discrete} - \log L_{gamma}$ ), the mean fixation probability ( $u_n$ ) and estimates of  $\alpha$  and  $\omega_a$ . Estimates are obtained for non-CpG-prone sites only using rat as an outgroup.

| <b>Site Class</b>  | <b><math>N_e s_2</math></b> | <b><math>p_1</math></b> | <b><math>p_2</math></b> | <b><math>p_3</math></b> | <b>Mean <math>N_e s</math></b> | <b><math>\Delta\log L</math></b> | <b><math>u_n</math></b> | <b><math>\alpha</math> (rat)</b> | <b><math>\omega_a</math> (rat)</b> |
|--------------------|-----------------------------|-------------------------|-------------------------|-------------------------|--------------------------------|----------------------------------|-------------------------|----------------------------------|------------------------------------|
| Zero-fold          | 7.63                        | 0.189                   | 0.0276                  | 0.786                   | 143                            | 18.7                             | 0.187                   | 0.224                            | 0.053                              |
| Two-fold (nonsyn.) | 27.7                        | 0.209                   | 0.0                     | 0.791                   | 144                            | -6.42                            | 0.209                   | 0.353                            | 0.114                              |
| UTRs               | 2.47                        | 0.72                    | 0.0                     | 0.282                   | 51                             | -4.82                            | 0.718                   | 0.106                            | 0.0851                             |
| CNEs               | 7.20                        | 0.46                    | 0.287                   | 0.249                   | 48.6                           | 57.9                             | 0.464                   | 0.0677                           | 0.0336                             |
